# Supplementary material for: Hot Electrons, Hot Holes, or Both? Tandem Synthesis of Imines Driven by the Plasmonic Excitation in Au/CeO2 Nanorods
Source: PubMed Central journal article supplement (PMC7466498; doi:10.3390/nano10081530), 2020-08-04

## Supplementary Materials

# Hot Electrons, Hot Holes, or Both? Tandem Synthesis of Imines Driven by the Plasmonic Excitation in Au/CeO<sub>2</sub> Nanorods

Ivo F. Teixeira <sup>1,\*</sup>, Mauricio S. Homsí <sup>2</sup>, Rafael S. Geonmonond <sup>2</sup>, Guilherme F. S. R. Rocha <sup>2</sup>, Yung-Kang Peng <sup>3</sup>, Ingrid F. Silva <sup>4</sup>, Jhon Quiroz <sup>5</sup> and Pedro H. C. Camargo <sup>2,5,\*</sup>

<sup>1</sup> Department of Chemistry, Federal University of São Carlos, São Carlos 13565-905, Brazil

<sup>2</sup> Department of Fundamental Chemistry, Institute of Chemistry, University of São Paulo, São Paulo 05508-000, Brazil; mauriciosamuel.homsí@usp.br (M.S.H.); rafaelsg31@gmail.com (R.S.G.); guilhermefrocha@gmail.com (G.F.S.R.R.)

<sup>3</sup> Department of Chemistry, City University of Hong Kong, Yeung Kin Man Academic Building, Hong Kong, China; ykpeng@cityu.edu.hk

<sup>4</sup> Department of Chemistry, ICEx, Universidade Federal de Minas Gerais, Belo Horizonte 31270-901, Brazil; ingridfs@ufmg.br

<sup>5</sup> Department of Chemistry, University of Helsinki, A.I. Virtasen aukio 1, 00100 Helsinki, Finland; jhon.quiroz@helsinki.fi

\* Correspondence: ivo@ufscar.br (I.F.T.); pedro.camargo@helsinki.fi (P.H.C.C.)

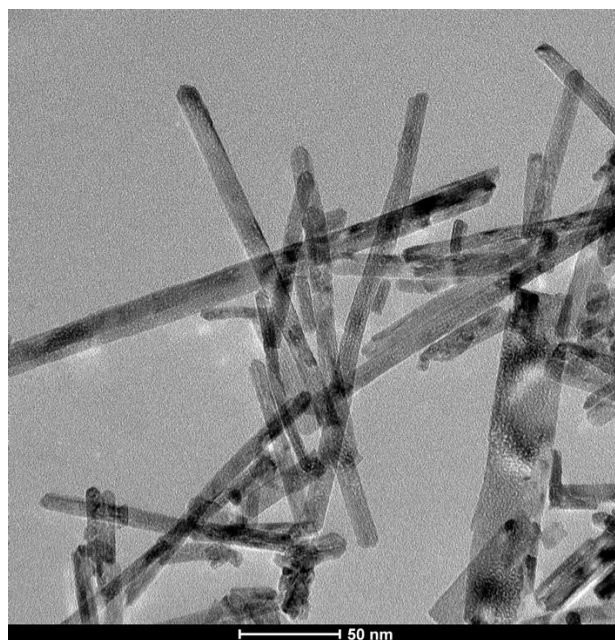

**Figure S1.** TEM images for the CeO<sub>2</sub> nanorods employed as starting materials for the synthesis of Au/CeO<sub>2</sub> nanorods.

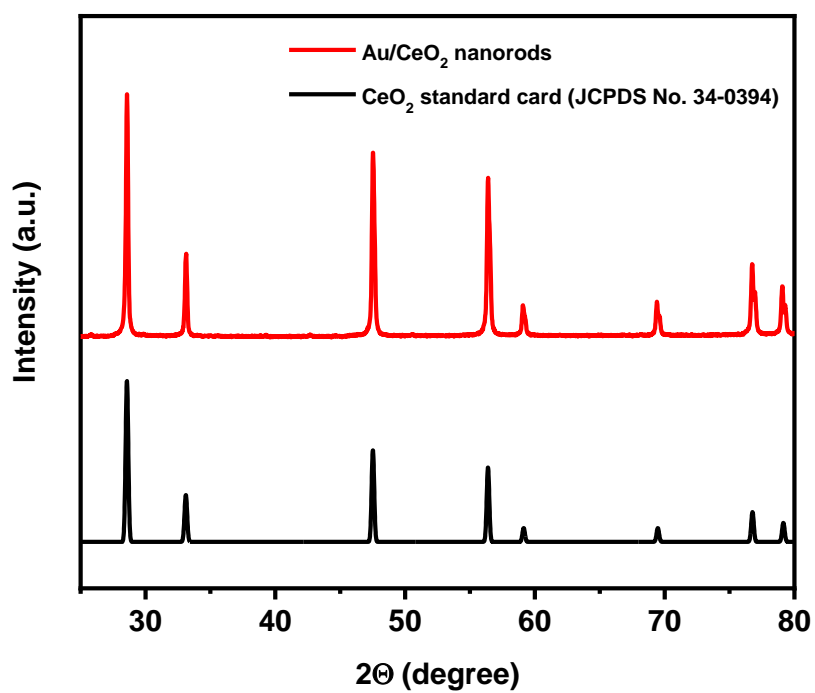

**Figure S2.** XRD pattern for Au/CeO<sub>2</sub> nanorods. The X-ray diffractometry evidenced the good crystallinity of the sample with peaks assigned to CeO<sub>2</sub> phase.

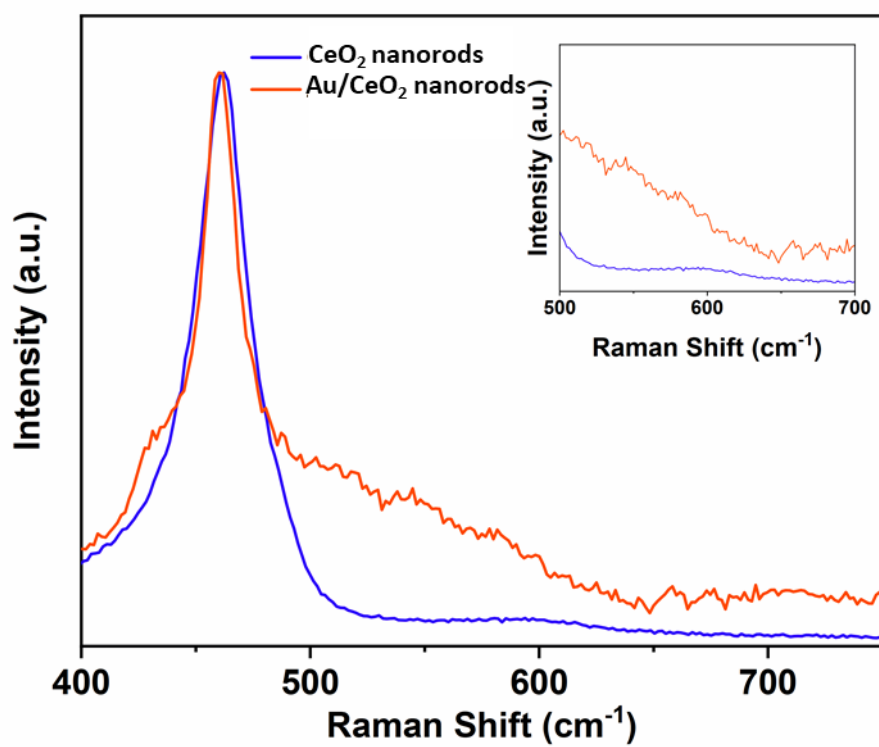

**Figure S3.** Raman spectra for CeO<sub>2</sub> (blue trace) and Au/CeO<sub>2</sub> (red trace) nanorods. The Raman spectrum of Au/CeO<sub>2</sub> displays a shoulder at 550–600 cm<sup>-1</sup> assigned to the presence of oxygen vacancies, which is more intense for the Au/CeO<sub>2</sub> nanomaterials relative to the CeO<sub>2</sub> nanorods.

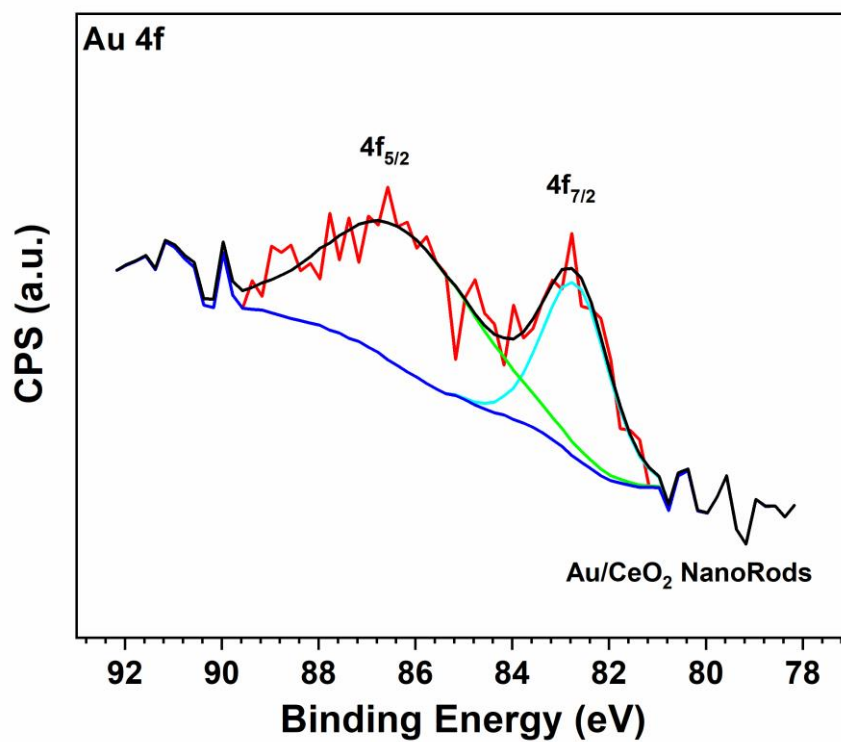

**Figure S4.** XPS spectra of the Au 4f core-levels for Au/CeO<sub>2</sub> Au/CeO<sub>2</sub> nanorods. It can be observed that for the nanorods, the Au signal is shifted to higher binding energies as a result of stronger metal-support interaction.

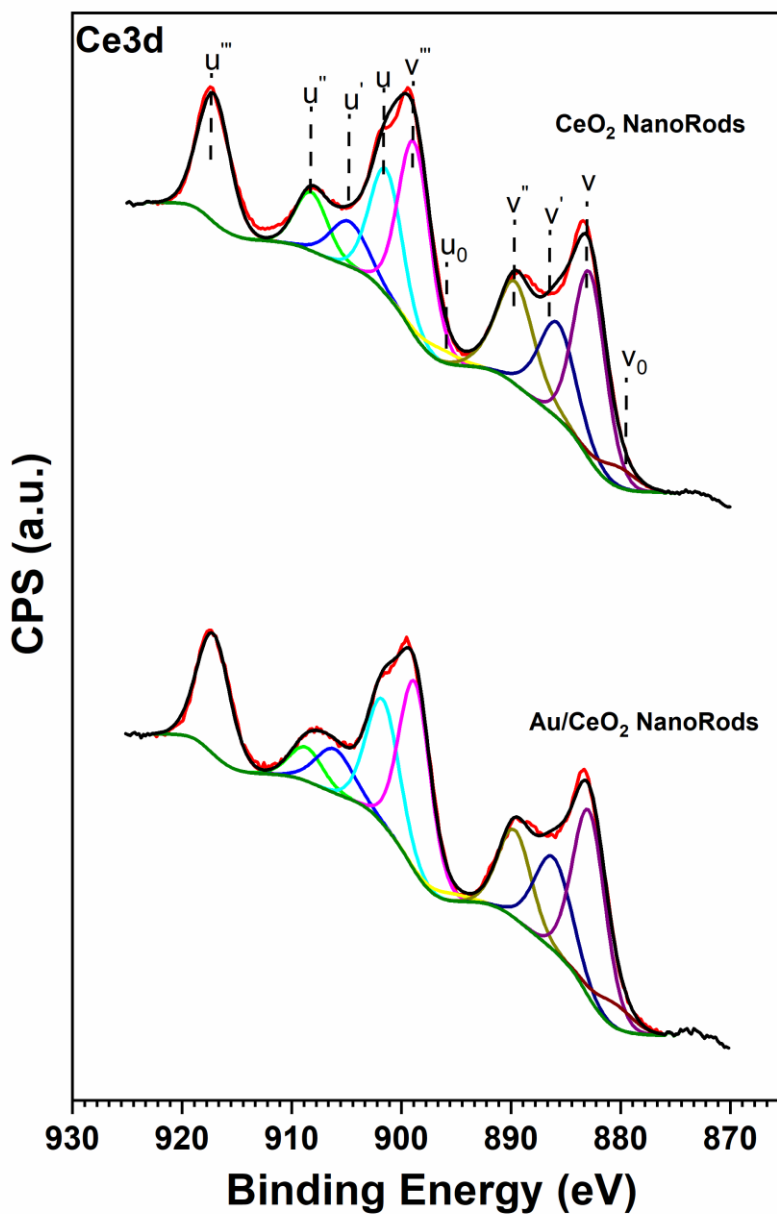

**Figure S5.** XPS spectra of the Ce 3d core levels for CeO<sub>2</sub> nanorods and Au/CeO<sub>2</sub> nanorods (top to bottom, respectively). No significant differences in the signals for Ce<sup>3+</sup> and Ce<sup>4+</sup> species were detected in the samples. They can be associated with different profiles: Ce<sup>3+</sup> ( $v_0$ ,  $v'$ ,  $u_0$  and  $u'$ ) and Ce<sup>4+</sup> ( $v$ ,  $v''$ ,  $v'''$ ,  $u$ ,  $u''$ , and  $u'''$ ). The estimated percentages of Ce<sup>3+</sup> and Ce<sup>4+</sup> ions reveal a minimal variance among the samples, suggesting that the addition of low quantities of gold is not promoting the presence of Ce<sup>3+</sup> and consequently the creation of oxygen vacancies on the cerium oxide as a result of the metal-support interaction [7].

**Table S1.** Binding energies (eV) of peak positions from Au 4f region and the atomic ratio of Au/Ce for the Au/CeO<sub>2</sub> nanorods.

| <b>Sample</b>                | <b>4f<sub>7/2</sub></b> | <b>4f<sub>5/2</sub></b> | <b>Au/Ce</b> | <b>%at Ce</b> | <b>%at Au</b> |
|------------------------------|-------------------------|-------------------------|--------------|---------------|---------------|
| Au/CeO <sub>2</sub> nanorods | 82.7                    | 86.3                    | 0.009        | 99.1          | 0.9           |

**Table S2.** Binding Energy (eV) of O 1s components of samples and relative atomic ratio among species (at. %). Table S2 depicts the BE values obtained from the XPS spectra for the O 1s region for pure CeO<sub>2</sub> and Au/CeO<sub>2</sub> samples, respectively. The signal was deconvoluted into three components located at around 529, 531 and 533 eV (Table S2). These are assigned to lattice oxygen (O<sub>L</sub>), oxygen vacancies or surface oxygen ions (O<sub>S</sub>), and adsorbed water (O<sub>W</sub>), respectively [8]. For all samples, the signal from O<sub>S</sub> had the highest contribution with 58% for individual CeO<sub>2</sub> nanorods. After the addition of Au, a slight decrease of the O<sub>S</sub> contribution was registered. These results indicate that the enrichment of oxygen vacancies or oxygen ions on the surface of CeO<sub>2</sub> is strongly associated with the shape of the oxide rather than by the addition of Au. It is noteworthy that the Au loading in these samples is very low.

| Sample                       | O 1s B.E. (at. %) |                |                |
|------------------------------|-------------------|----------------|----------------|
|                              | O <sub>L</sub>    | O <sub>S</sub> | O <sub>W</sub> |
| Au/CeO <sub>2</sub> nanorods | 529.1 (28)        | 530.8 (45)     | 533.2 (27)     |
| CeO <sub>2</sub> Nanorods    | 528.5 (23)        | 530.4 (58)     | 532.7 (19)     |

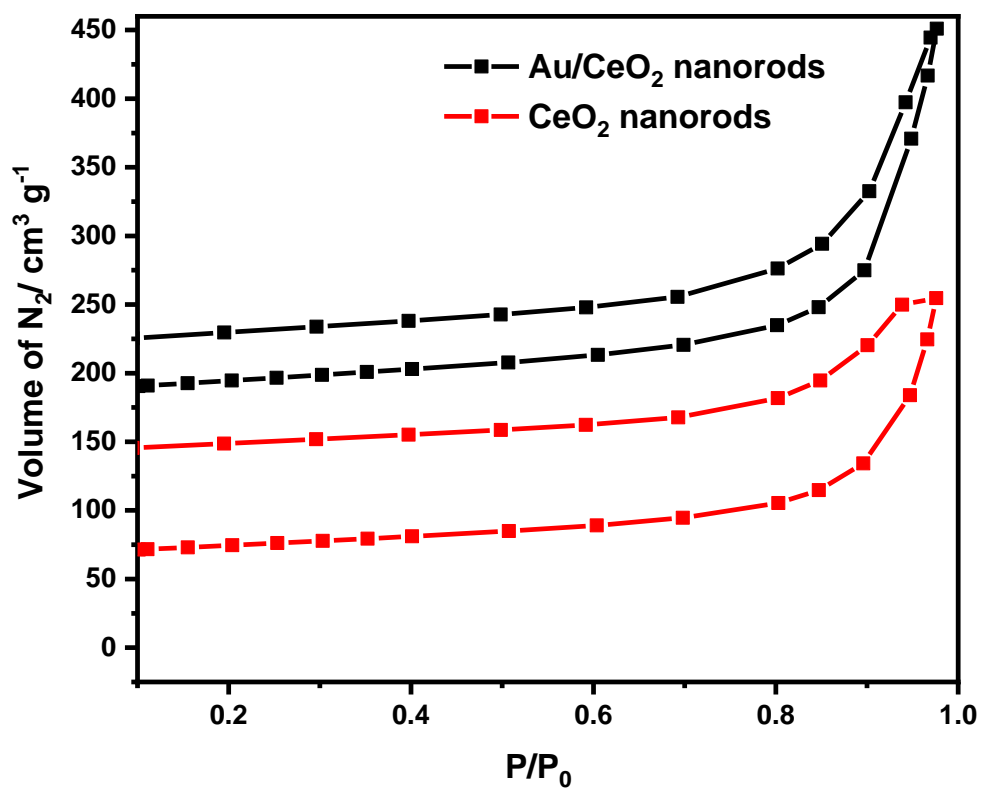

**Figure S6.** Isotherms BET for CeO<sub>2</sub> nanorods (red trace) and Au/CeO<sub>2</sub> nanorods (black trace). The CeO<sub>2</sub> nanorods samples display a similar porosity and surface area when compared with the Au/CeO<sub>2</sub> nanorods.



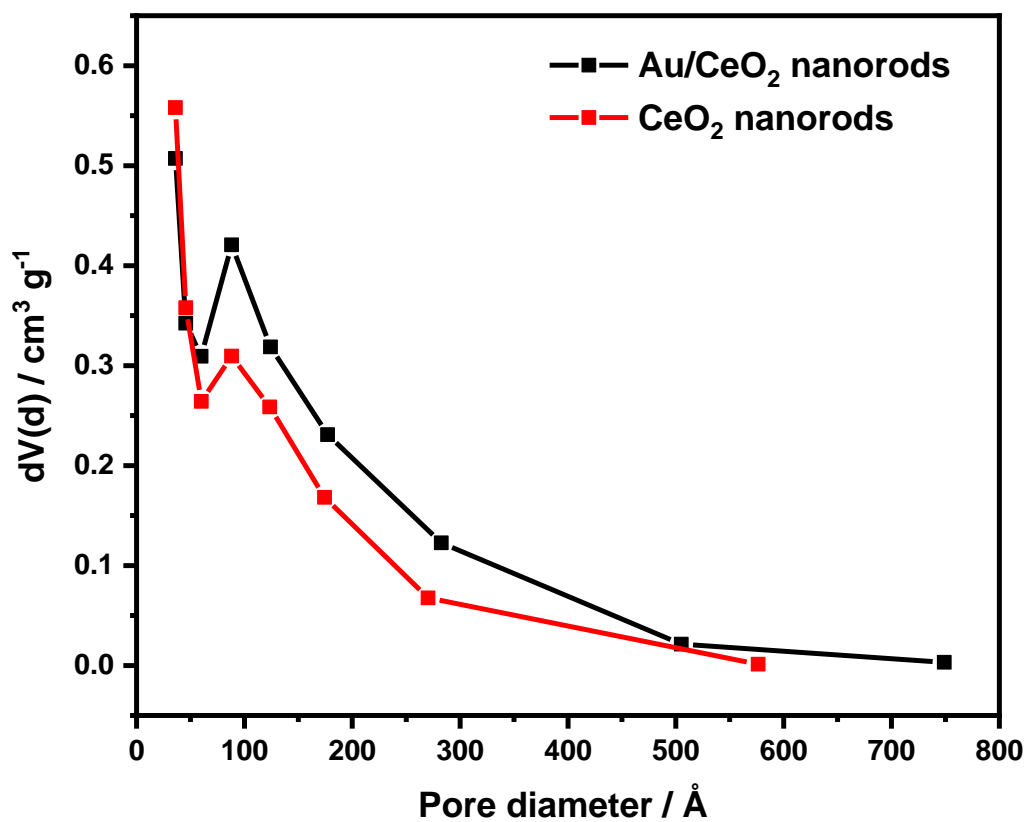

**Figure S7.** BJH pore diameter distribution for the for CeO<sub>2</sub> nanorods (red trace) and Au/CeO<sub>2</sub> nanorods (black trace). The CeO<sub>2</sub> nanorods samples present mainly mesoporous with larger pores diameters.

**Table S3.** BET surface area and average pore diameter from Figures S6 and S7.

| <b>Sample</b>                | <b>Area BET<br/>(<math>\text{m}^2\cdot\text{g}^{-1}</math>)</b> | <b>Pore Diameter<br/>(<math>\text{Å}</math>)</b> |
|------------------------------|-----------------------------------------------------------------|--------------------------------------------------|
| Au/CeO <sub>2</sub> Nanorods | 86.3                                                            | 177.2                                            |
| CeO <sub>2</sub> Nanorods    | 70.6                                                            | 123.7                                            |

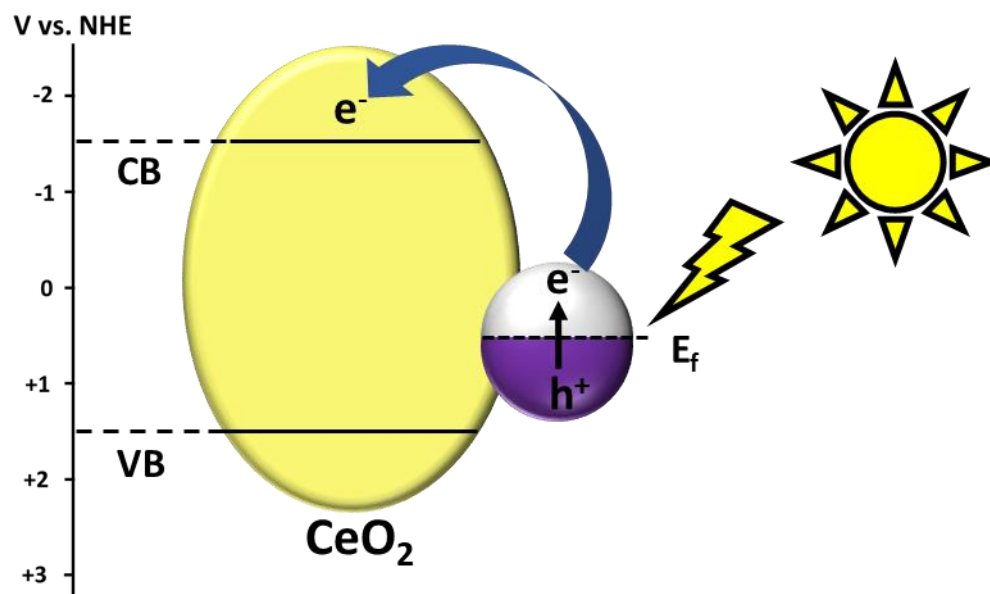

**Figure S8.** Energy level diagram for the Au/CeO<sub>2</sub> nanorod photocatalyst, illustrating the injection of hot electrons on the conduction band of the CeO<sub>2</sub> and the generation of hot holes in the Au NPs.

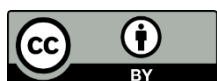

Supplement: nanomaterials-10-01530-s001.pdf [file nanomaterials-10-01530-s001.pdf]
